# Supplementary material for: Rapid and enzyme-free nucleic acid detection based on exponential hairpin assembly in complex biological fluids
Source: Royal Society of Chemistry journal article supplement (doi:10.1039/c6an00474a), 2016-01-01
Supplement: c6an00474a1.pdf [file c6an00474a1.pdf]

## Supporting Information

### **Rapid and Enzyme-free Nucleic Acids Based on Exponential Hairpin Assembly in Complex Biological Fluids**

**Cuiping Ma,<sup>a,b</sup> Menghua Zhang,<sup>a,b</sup> Shan Chen,<sup>c</sup> Chao Liang<sup>a,b</sup> and Chao Shi<sup>a,b\*</sup>**

*<sup>a</sup> Key Laboratory of Sensor Analysis of Tumor Marker, Ministry of Education, College of Chemistry and Molecular Engineering, Qingdao University of Science and Technology, Qingdao 266042, PR China.*

*<sup>b</sup> Shandong Provincial Key Laboratory of Biochemical Analysis, College of Chemistry and Molecular Engineering, Qingdao University of Science and Technology, Qingdao 266042, PR China.*

*<sup>c</sup> College of Food Science and Engineering, Northwest Agriculture and Forestry University, Xianyang 712100, PR China*

**\*Corresponding authors.**

**Prof. Dr. Chao, Shi; Tel. (Fax.): +86-84022680. E-mail: [sc169@163.com](mailto:sc169@163.com)**

## Experimental Section

**Materials:** Oligonucleotides involved in this study were designed by using NUPACK software (<http://www.nupack.org/>) and produced by Shanghai Bio-Engineering Company (Shanghai, China). All DNAs (sequences listed in Table S1-5) were purified by high-performance liquid chromatography (HPLC). RPMI 1640 cell medium including 10% fetal bovine serum (FBS) was purchased from Shanghai Bio-Engineering Company (Shanghai, China). All other reagents were of analytical grade and used as received.

**Methods:** The DNA stock solutions were prepared in sterilized hybridization buffer (20 mM Tris-HCl, 3 mM MgCl<sub>2</sub>, pH 7.4), and were heated to 95°C for 5 min and then cooled to room temperature for use. Different concentrations of target DNA were added to a final volume 100 µL (10 mM PBS, 5 mM MgCl<sub>2</sub>, pH 7.4) including each of four DNA hairpins in a final concentration of  $5.0 \times 10^{-7}$  M. The reaction system was incubated at room temperature for 15 min, followed by agarose gel electrophoresis or fluorescence detection by a Hitachi F-4500 spectrophotometer (Tokyo, Japan) equipped with a xenon lamp.

Supplementary Figures

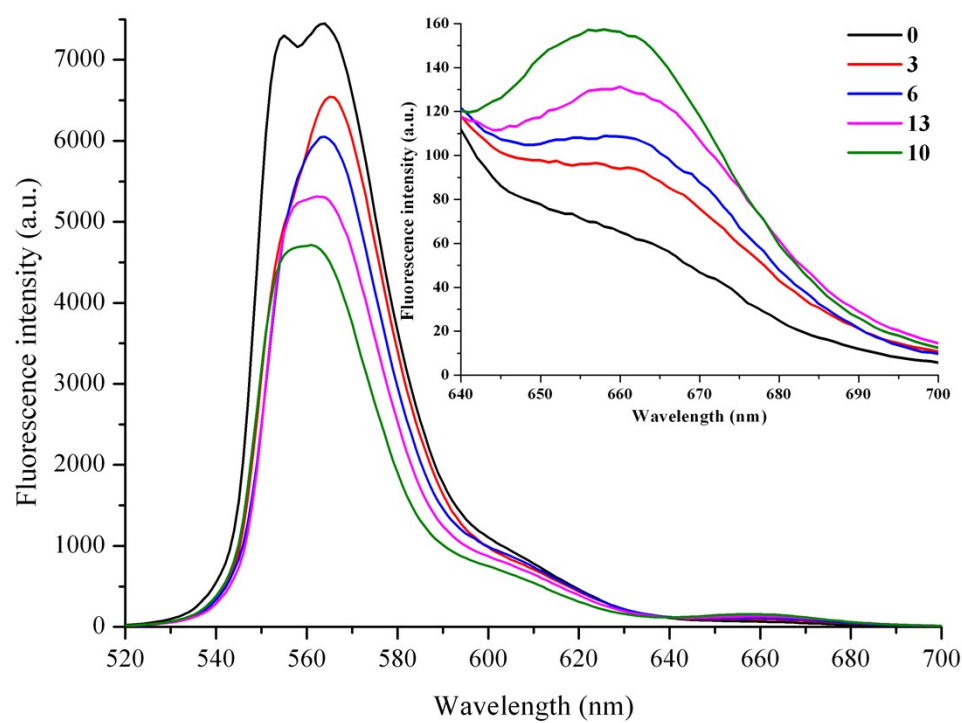

**Figure S1.** The FRET efficiency from Cy3 to Cy5 was optimized. The distance we optimized between Cy3 and Cy5 were 0 base, 3 bases, 6 bases, 10 bases and 13 bases. The sequences can be found in Table S1-5.

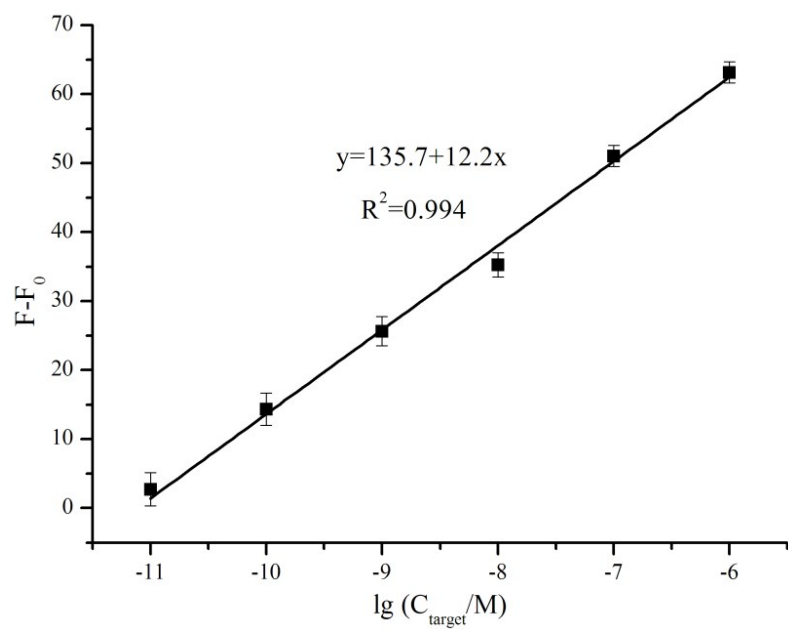

**Figure S2.** The relationship between the change in fluorescence signal of Cy5 and the logarithm of the target DNA concentration.

Additionally, pyrene can also act as a spatially sensitive fluorescent dye and have been introduced to nucleic acids detection in complex biological fluids.<sup>1</sup> We have labeled hairpins H2 and H3 at two ends with pyrene moieties, and the result was shown in Figure S3. According to the literature,<sup>2-3</sup> the formation of the pyrene excimer of aromatic hydrocarbons is restricted to a parallel, aspectant configuration, while two pyrene molecule were brought into close enough by a head- to- head way in our detection system. Therefore, the result was not satisfactory.

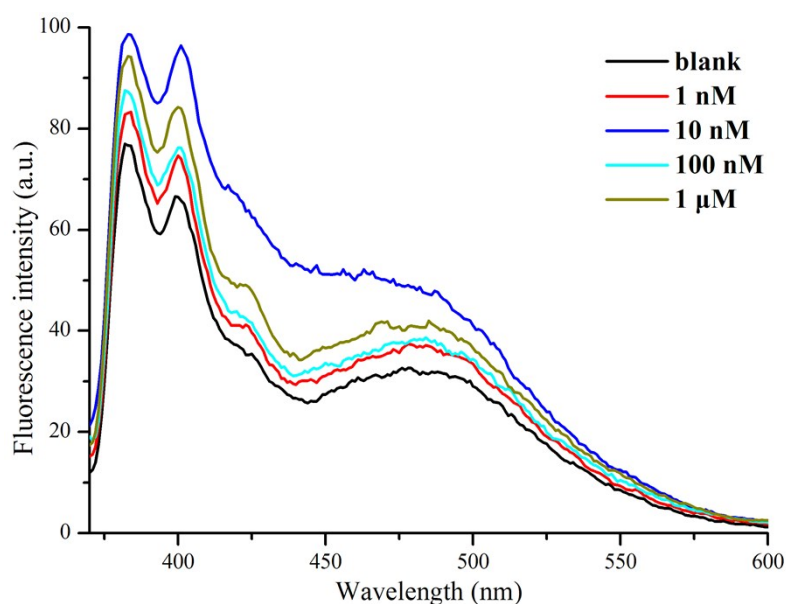

**Figure S3.** Fluorescence spectra in the presence of different concentrations of target DNA under  $\lambda_{\text{ex}} = 340$  nm. The DNA hairpins H2 and H3 were dual-labeled with pyrene moieties.

Supplementary Tables

Supplementary Table S1: Sequences used in this work.

| Name (domain)           | Sequence (from 5' to 3')                                                                                                             |
|-------------------------|--------------------------------------------------------------------------------------------------------------------------------------|
| H1(5-2'-3'-4-3-2-1)     | CTGTGAGTGAAC <b>TGCGAG-ACAACC-</b><br><b>GAAACCGTTAGAGCCAAC-<i>CAGAAC-</i></b><br><b>GTTGGCTCTAACGGTTTC-GGTTGT-GGATTG</b>            |
| H2(4'-3-1'-2'-3')       | GTTCTG- <b>GTTGGCTCTAACGGTTTC-<i>CAATCC-ACAACC-</i></b><br><b>GAAACCGTTAGAGCCAAC</b>                                                 |
| H3(2-5'-6-4-5)          | GGTTGT- <b>CTCGCAGT(Cy3)TCACTCACAG-<i>AGGAGT-CAGAAC-</i></b><br><b>CTGTGAGTGAAC<b>TGCGAG</b></b>                                     |
| H4(3'-4-5-2'-5'-4'-6')  | GAAACCGTTAGAGCCAAC- <b>CAGAAC-</b><br><b>CTGTGAGTGAAC<b>TGCGAG-<i>ACAACC-</i></b></b><br><b>CTCGCAGTTCACTCACAG-GTTCTG-ACTCCT-Cy5</b> |
| T (matched)(1'-2'-3')   | CAATCC-ACAACC-GAAACCGTTAGAGCCAAC                                                                                                     |
| T(mismatched)(1'-2'-3') | CAATCC-ACAAC <span style="border: 1px solid black; padding: 0 2px;">T</span> -GAAACCGTTAGAGCCAAC                                     |
| T(inserted)(1'-2'-3')   | CAATCC-ACAACC- <span style="border: 1px solid black; padding: 0 2px;">A</span> GAAACCGTTAGAGCCAAC                                    |
| T(deleted)(1'-2'-3')    | CAATCC-ACAACC- <span style="border: 1px solid black; padding: 0 2px;"> </span> AAACCGTTAGAGCCAAC                                     |

All sequences used were annotated with domain names, each of which represented a short oligonucleotide fragment. The numbered domain was complementary with the corresponding marked domain by a symbol ('). The boldface and italic portions in hairpins were stems and loops, respectively. The mismatched, deleted, and inserted bases of target DNA were shown by boxes.

**Supplementary Table S2:** All Sequences used for the Cy3-Cy5 distance with 0 base.

| Name (domain)          | Sequence (from 5' to 3')                                                                                                        |
|------------------------|---------------------------------------------------------------------------------------------------------------------------------|
| H1(5'-2'-3'-4-3-2-1)   | Cy3-CTGTGAGTGA <b>ACTGCGAG-ACAACC-</b><br><b>GAAACCGTTAGAGCCAAC-<i>CAGAAC</i>-GTTGGCTCTAACGGTTTC-</b><br><b>GGTTGT-GGATTG</b>   |
| H2(4'-3-1'-2'-3')      | GTTCTG- <b>GTTGGCTCTAACGGTTTC-<i>CAATCC-ACAACC-</i></b><br><b>GAAACCGTTAGAGCCAAC</b>                                            |
| H3(2'-5'-6-4-5)        | <b>GGTTGT-CTCGCAGTTCACTCACAG-<i>AGGAGT-CAGAAC-</i></b><br><b>CTGTGAGTGA<b>ACTGCGAG</b></b>                                      |
| H4(3'-4-5-2'-5'-4'-6') | <b>GAAACCGTTAGAGCCAAC-<i>CAGAAC</i>-CTGTGAGTGA<b>ACTGCGAG-</b></b><br><b><i>ACAACC-CTCGCAGTTCACTCACAG-GTTCTG</i>-ACTCCT-Cy5</b> |
| T(1'-2'-3')            | CAATCC-ACAACC-GAAACCGTTAGAGCCAAC                                                                                                |

All sequences used were annotated with domain names, each of which represented a short oligonucleotide fragment. The numbered domain was complementary with the corresponding marked domain by a symbol ('). The boldface and italic portions in hairpins were stems and loops, respectively.

**Supplementary Table S3:** All Sequences used for the Cy3-Cy5 distance with 3 bases.

| Name (domain)          | Sequence (from 5' to 3')                                                                                                                       |
|------------------------|------------------------------------------------------------------------------------------------------------------------------------------------|
| H1(5-2'-3'-4-3-2-1)    | Cy3-CTGTGAGTGAAC <b>TGCGAG-ACAACC-</b><br><b>GAAACCGTTAGAGCCAAC-<i>CAGAAC</i>-GTTGGCTCTAACGGTTTC-</b><br><b>GGTTGT-GGATTG</b>                  |
| H2(4'-3-1'-2'-3')      | GTTCTG- <b>GTTGGCTCTAACGGTTTC-<i>CAATCC-ACAACC-</i></b><br><b>GAAACCGTTAGAGCCAAC</b>                                                           |
| H3(2-5'-6-4-5)         | GGTTGT- <b>CTCGCAGTTCACTCACAG-</b> <span style="border: 1px solid black;">TTT</span> <i>AGGAGT-CAGAAC-</i><br><b>CTGTGAGTGAAC<b>TGCGAG</b></b> |
| H4(3'-4-5-2'-5'-4'-6') | GAAACCGTTAGAGCCAAC- <b>CAGAAC-CTGTGAGTGAAC<b>TGCGAG-</b></b><br><b><i>ACAACC-CTCGCAGTTCACTCACAG-GTTCTG-CTCCT</i>-Cy5</b>                       |
| T(1'-2'-3')            | CAATCC-ACAACC-GAAACCGTTAGAGCCAAC                                                                                                               |

All sequences used were annotated with domain names, each of which represented a short oligonucleotide fragment. The numbered domain was complementary with the corresponding marked domain by a symbol ('). The boldface and italic portions in hairpins were stems and loops, respectively. Three poly-T inserted into domain 5' and 6 of H3 were boxed.

**Supplementary Table S4:** All Sequences used for the Cy3-Cy5 distance with 6 bases.

| Name (domain)          | Sequence (from 5' to 3')                                                                               |
|------------------------|--------------------------------------------------------------------------------------------------------|
| H1(5-2'-3'-4-3-2-1)    | CTGTGAGTGAAGTGGGAG- <b>ACAACC</b> -GAAACCGTTAGAGCCAAC- <i>CAGAAC</i> -GTTGGCTCTAACGGTTTC-GGTTGT-GGATTG |
| H2(4'-3-1'-2'-3')      | GTTCTG-GTTGGCTCTAACGGTTTC- <i>CAATCC</i> - <b>ACAACC</b> -GAAACCGTTAGAGCCAAC                           |
| H3(2-5'-6-4-5)         | GGTTGT-CTCGCAGTTCAC(Cy3)TCACAG- <i>AGGAGT</i> - <i>CAGAAC</i> -CTGTGAGTGAAGTGGGAG                      |
| H4(3'-4-5-2'-5'-4'-6') | GAAACCGTTAGAGCCAAC-CAGAAC-CTGTGAGTGAAGTGGGAG- <i>ACAACC</i> -CTCGCAGTTCACCTCACAG-GTTCTG-ACTCCT-Cy5     |
| T(1'-2'-3')            | CAATCC-ACAACC-GAAACCGTTAGAGCCAAC                                                                       |

All sequences used were annotated with domain names, each of which represented a short oligonucleotide fragment. The numbered domain was complementary with the corresponding marked domain by a symbol ('). The boldface and italic portions in hairpins were stems and loops, respectively.

**Supplementary Table S5:** All Sequences used for the Cy3-Cy5 distance with 13 bases.

| Name (domain)          | Sequence (from 5' to 3')                                                                                        |
|------------------------|-----------------------------------------------------------------------------------------------------------------|
| H1(5-2'-3'-4-3-2-1)    | CTGTGAGTGA <del>ACTGCGAG-ACAACC-GAAACCGTTAGAGCCAAC-CAGAAC-GTTGGCTCTAACGGTTTC-GGTTGT-GGATTG</del>                |
| H2(4'-3-1'-2'-3')      | GTTCTG-GTTGGCTCTAACGGTTTC- <del>CAATCC-ACAACC-GAAACCGTTAGAGCCAAC</del>                                          |
| H3(2-5'-6-4-5)         | GGTTGT-CTCGC(Cy3)AGTTC <del>ACTCACAG-AGGAGT-CAGAAC-CTGTGAGTGA<del>ACTGCGAG</del></del>                          |
| H4(3'-4-5-2'-5'-4'-6') | GAAACCGTTAGAGCCAAC-CAGAAC-CTGTGAGTGA <del>ACTGCGAG-ACAACC-CTCGCAGTTC<del>ACTCACAG-GTTCTG-ACTCCT-Cy5</del></del> |
| T(1'-2'-3')            | CAATCC-ACAACC-GAAACCGTTAGAGCCAAC                                                                                |

All sequences used were annotated with domain names, each of which represented a short oligonucleotide fragment. The numbered domain was complementary with the corresponding marked domain by a symbol ('). The boldface and italic portions in hairpins were stems and loops, respectively.

**Reference:**

1 C. C. Wu, C. M. Wang, L. Yan and C. Y. J. Yang, *J. Biomed. Nanotechnol.* 2009, **5**, 1-10.

2 Z. H. Qing, X. X. He, J. Huang, K. M. Wang, Z. Zou, T. P. Qing, Z. G. Mao, H. Shi and D. G. He, *Anal. Chem.* 2014, **86**, 4934-4939.

3 M. Masuko, H. Ohtani, K. Ebata and A. Shimadzu, *Nucleic Acids Res.* 1998, **26**, 5409-5416.
